# Supplementary material for: Spin-Canted Mn–Mn Coupling in Symmetry-Broken Chloride Dimer with Dual-Responsive Luminescence and Sensing
Source: Research Square preprint supplement (doi:10.21203/rs.3.rs-7666204/v1), 2025-10-07
Supplement: Supplementary file 1 [file b9a95a91ca61c373cdab845a.docx]

**[Supplementary Information](https://static-content.springer.com/esm/art%3A10.1038%2Fs41467-022-35366-3/MediaObjects/41467_2022_35366_MOESM1_ESM.pdf)**

**Spin-Canted** **Mn–Mn Coupling in** **Symmetry-Broken** **Chloride Dimer** **with Dual-Responsive** **Luminescence and Sensing**

Guojun Zhou1, #, *, Pei Wang1, #, Qiqiong Ren1, #, Nan Zhang1, Jin Lv1, Yilin Mao1, Jianwei Qiao2, *, Xian-Ming Zhang1, 3, *

1Key Laboratory of Magnetic Molecules and Magnetic Information Material, Ministry of Education, School of Chemistry and Chemistry Engineering, Shanxi Normal University, Taiyuan 030031, China

2College of Physics and Optoelectronics, Taiyuan University of Technology, Taiyuan 030024, China

3College of Chemistry & Chemical Engineering, Key Laboratory of Interface Science and Engineering in Advanced Material, Taiyuan University of Technology, Taiyuan, 030024, China

#These three authors as co-first authors contributed equally to this work.

*E-mail: [zhougj@sxnu.edu.cn](mailto:mailtozhougj@sxnu.edu.cn) (G. J. Z.); [qiaojianwei@tyut.edu.cn](mailto:qiaojianwei@tyut.edu.cn) (Q. J. W.); [zhangxianming@tyut.edu.cn](mailto:zhangxianming@tyut.edu.cn) (X. M. Z.)


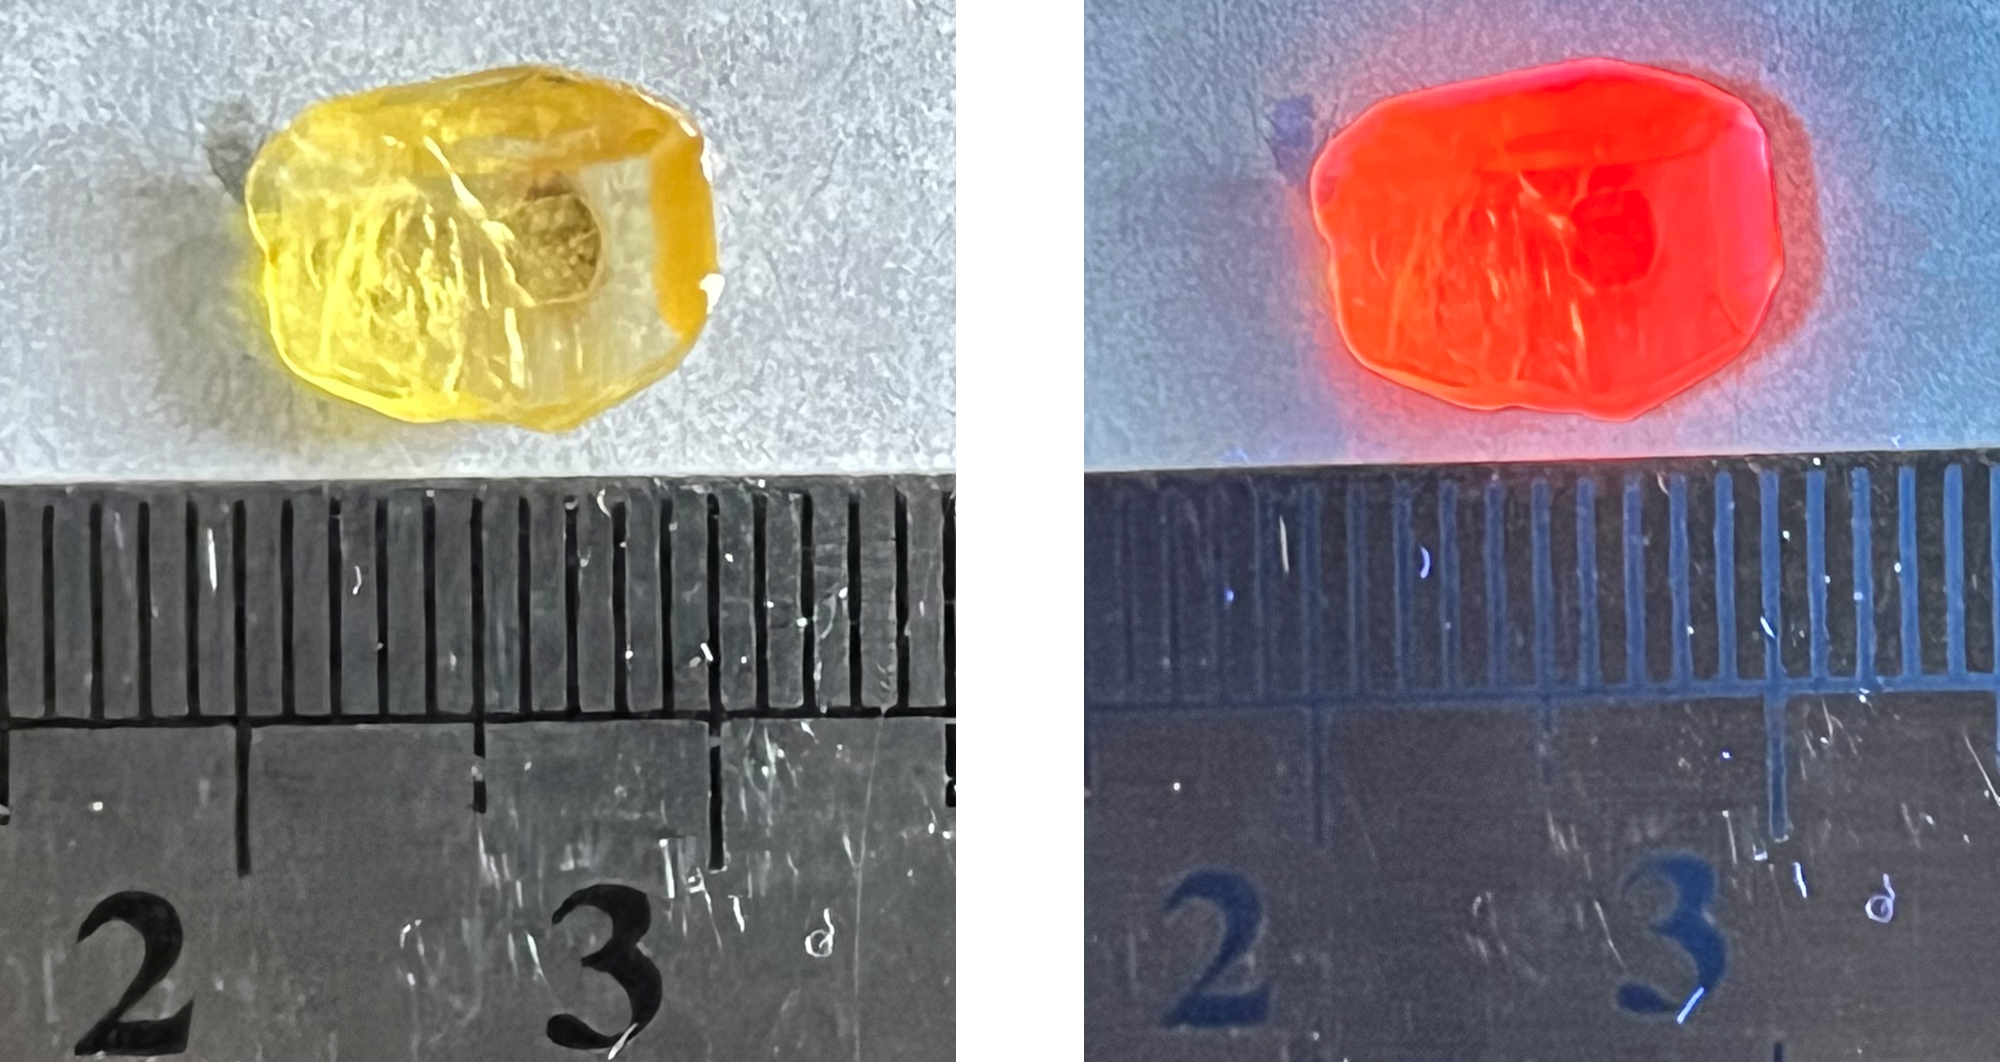


**Fig. S1** Centimeter-scale single crystals of (C10H20O5Mn)(CH3CN)MnCl4 under natural light and UV lamp.


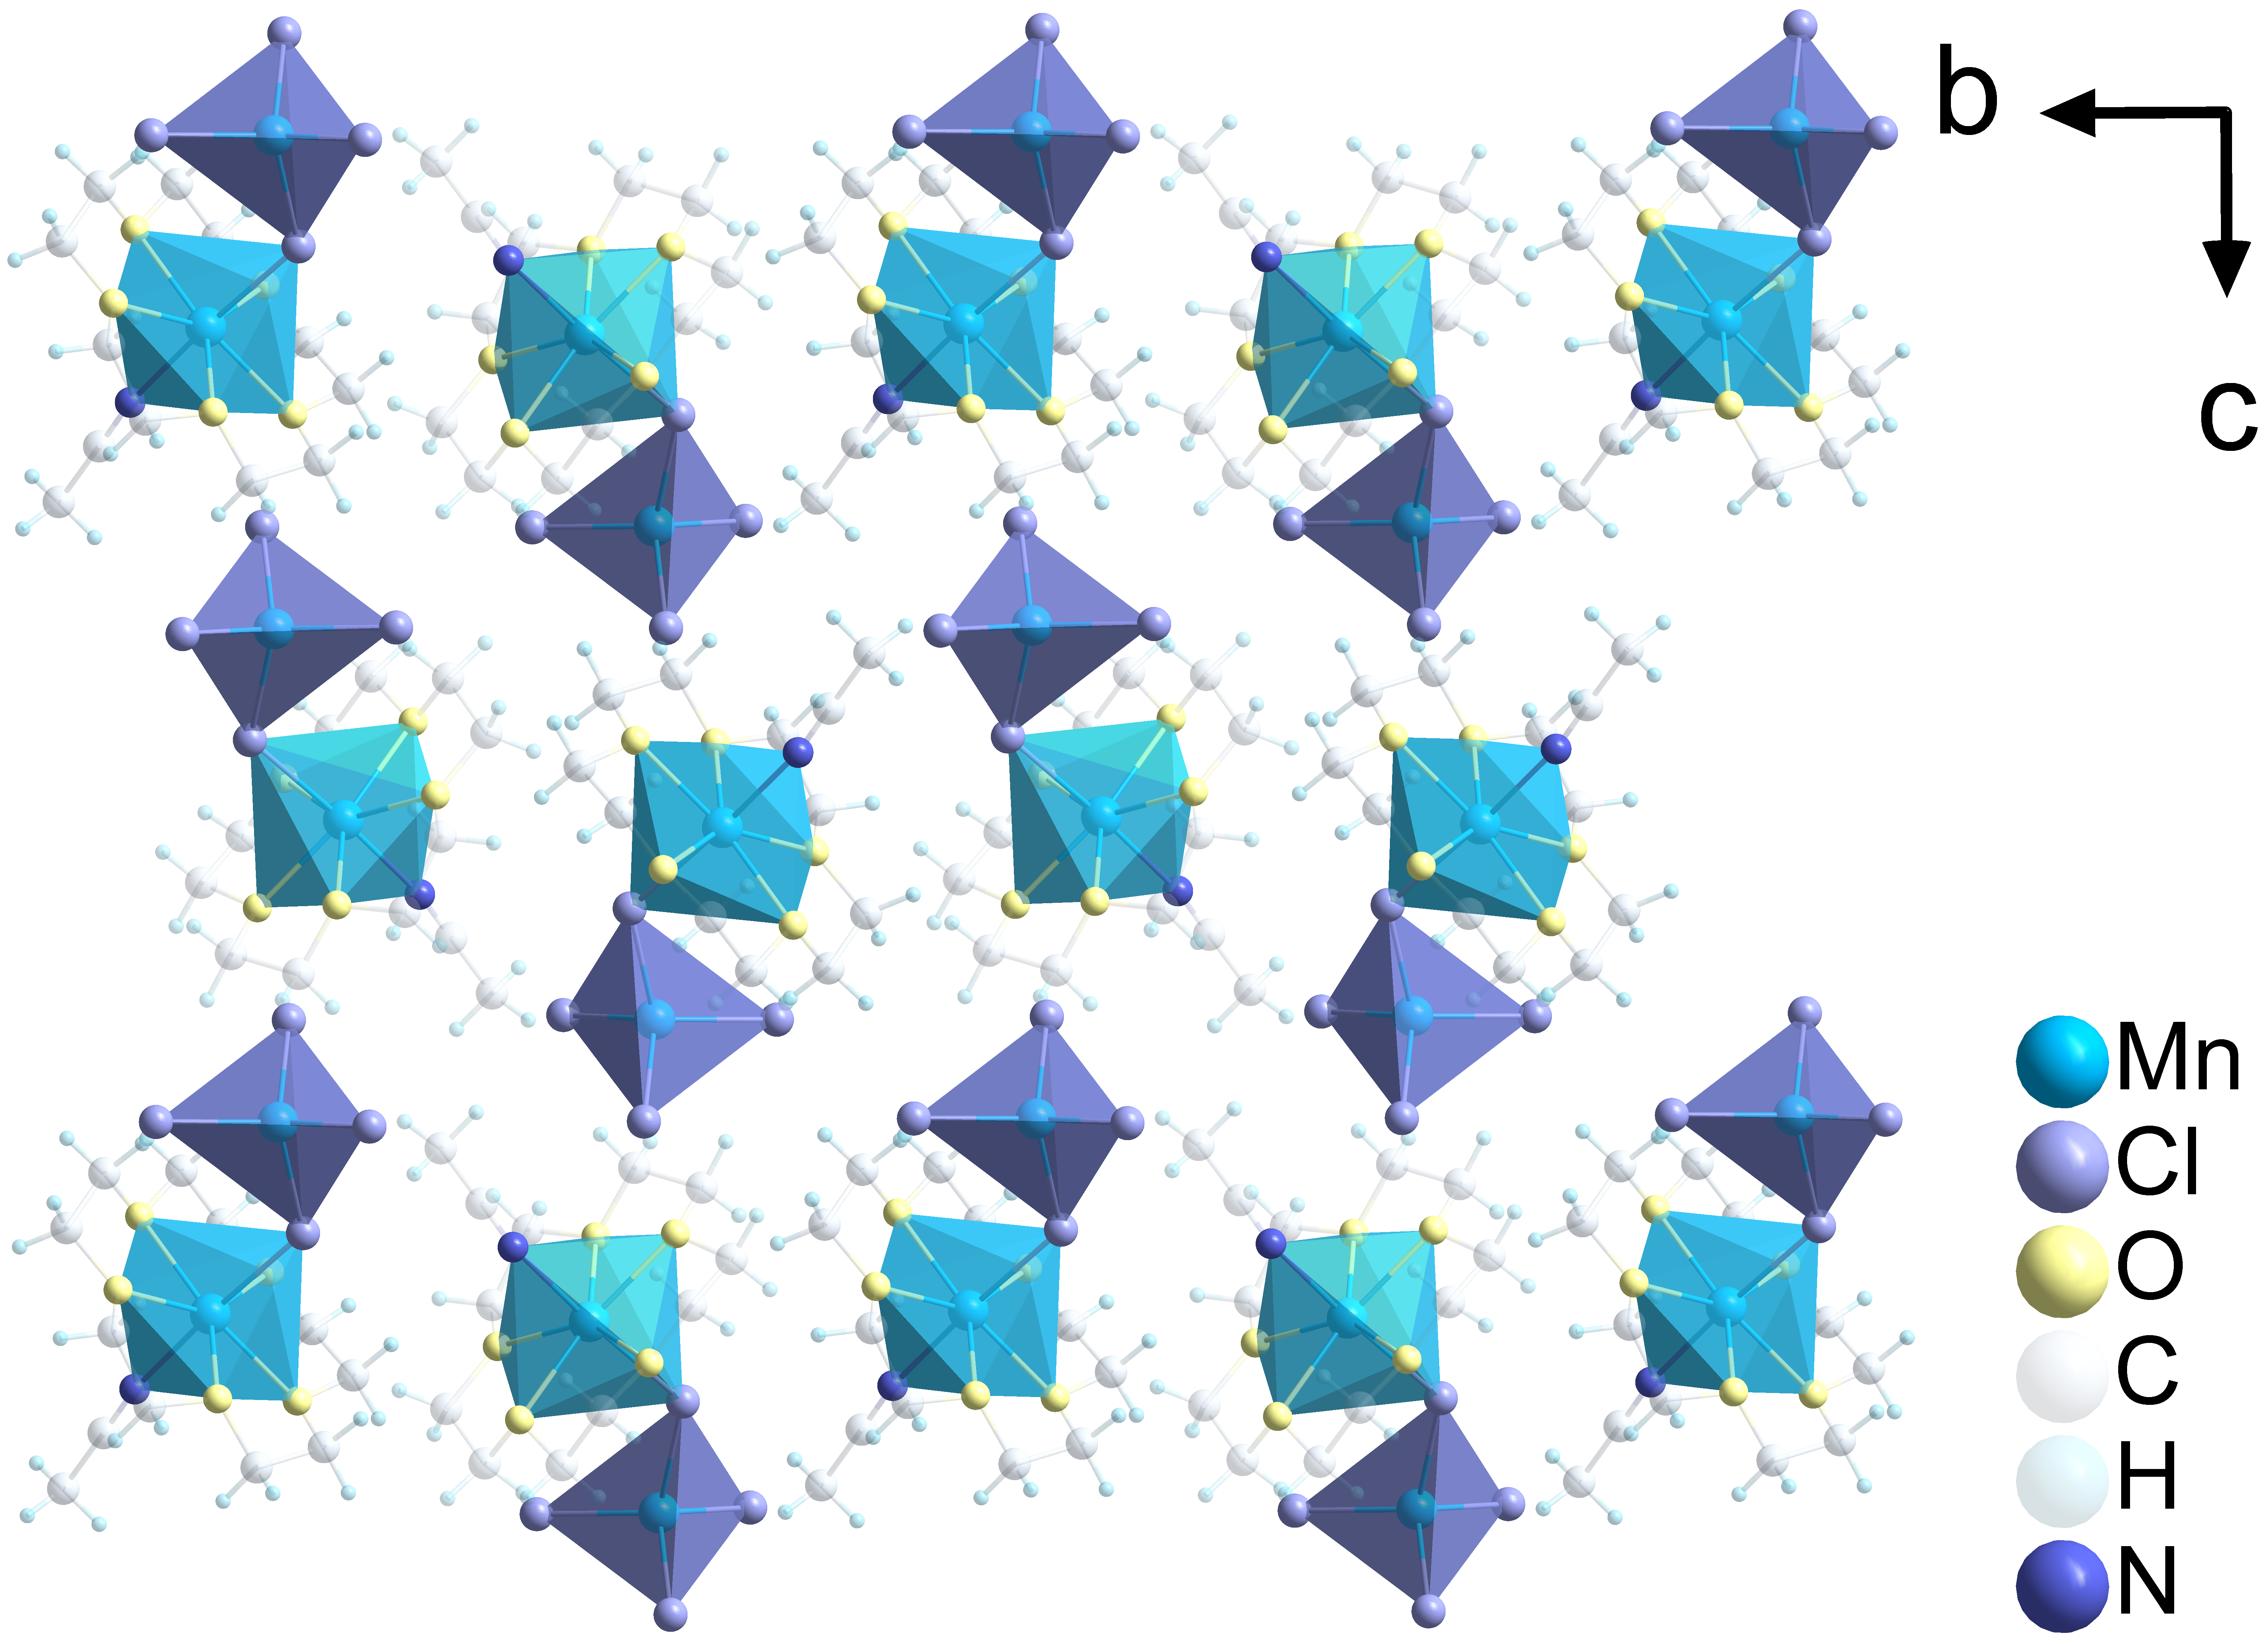


**Fig. S2** Packing views of (C10H20O5Mn)(CH3CN)MnCl4 unit cell along *a* axis.


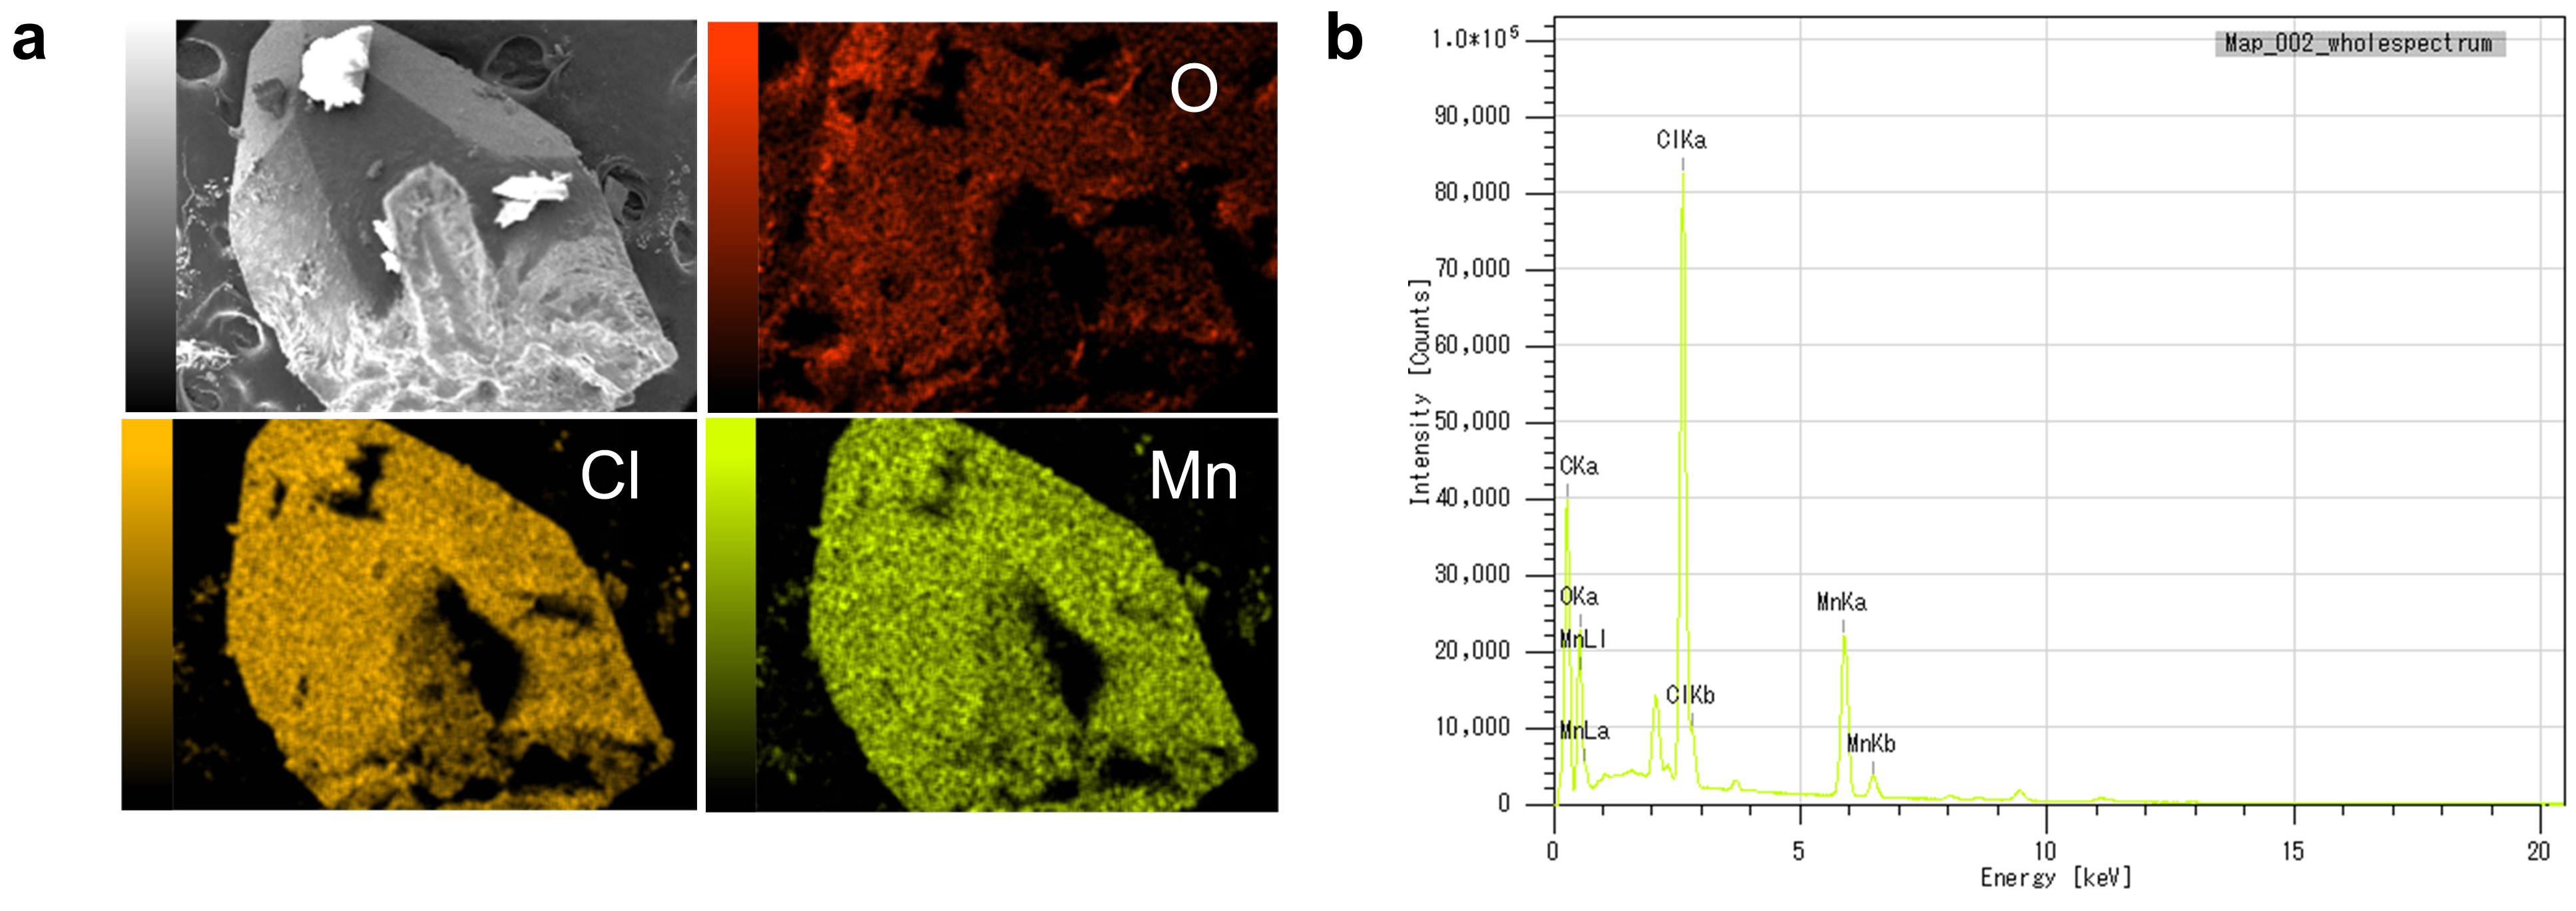


**Fig. S3** **a)** Scanning electron microscopy (SEM) and elemental mappings of Mn, O, Cl **b)** Energy dispersive spectrometer EDS elemental mappings of (C10H20O5Mn)(CH3CN)MnCl4.


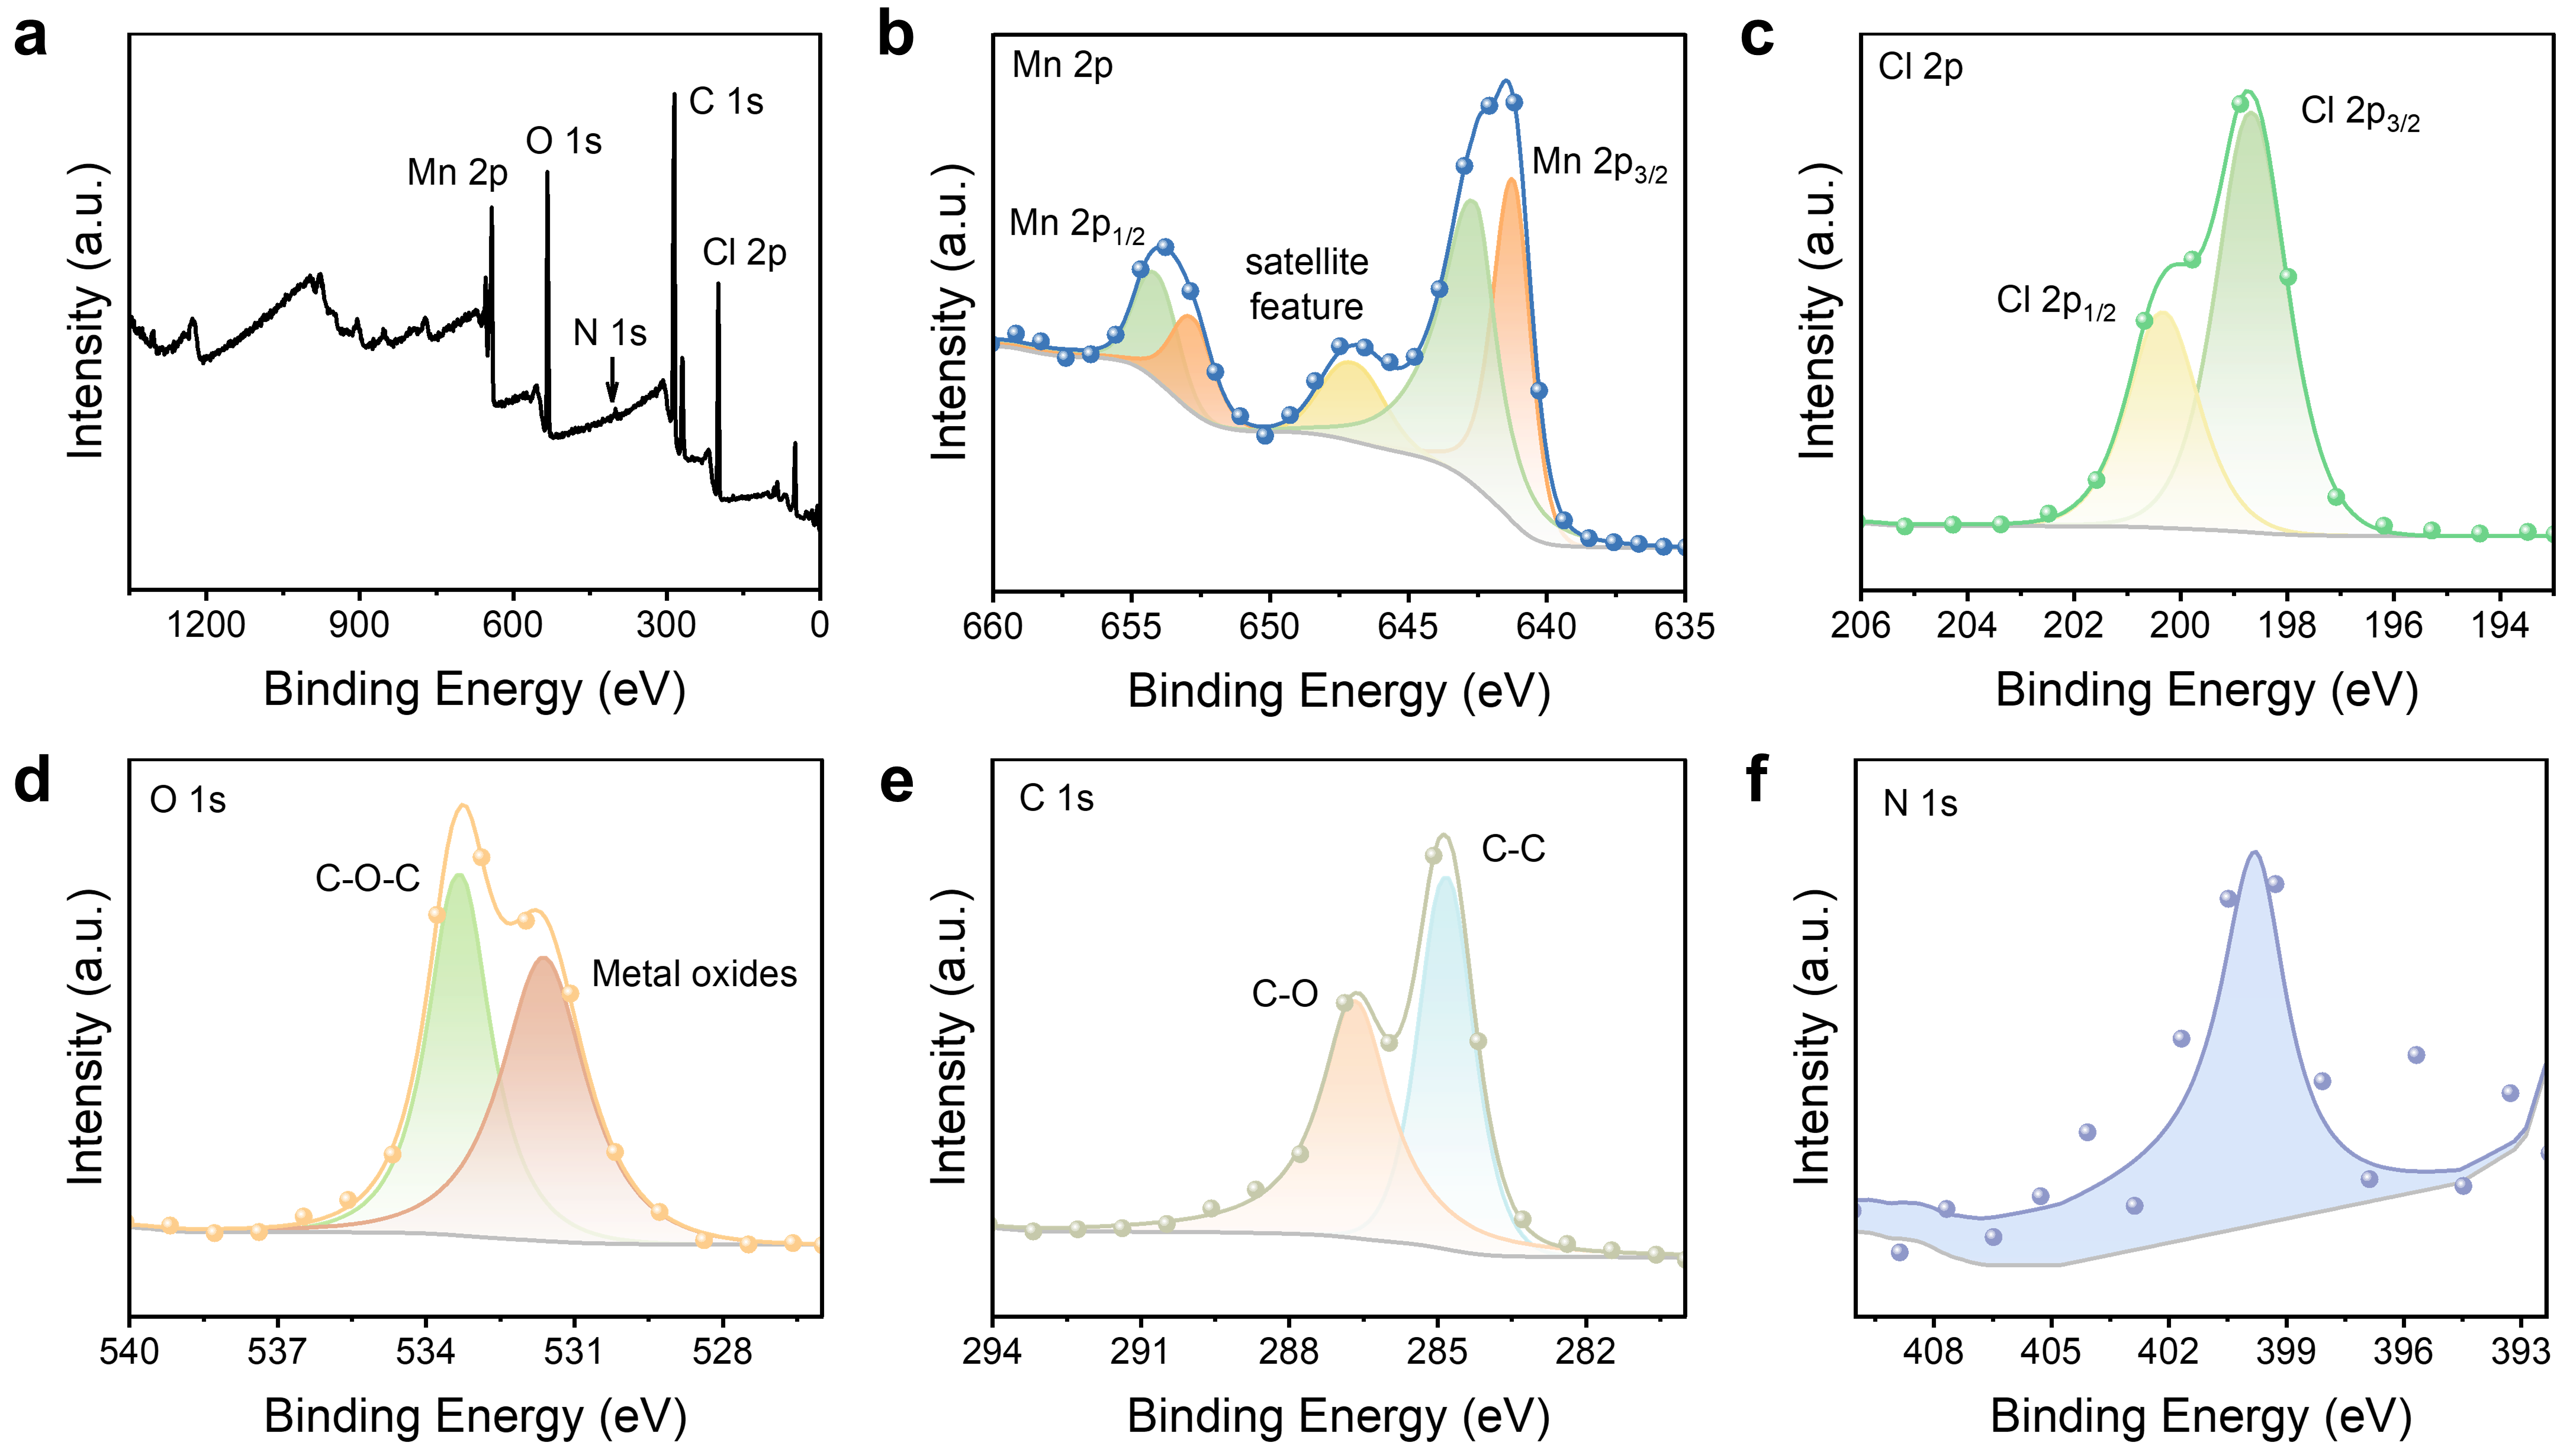


**Fig. S4** XPS spectra for **a)** survey scan and high-resolution XPS spectra of **b)** Mn 2p; **c**) Cl 2p; **d)** O 1s; **e)** C 1s; **f)** N 1s in (C10H20O5Mn)(CH3CN)MnCl4 crystals.


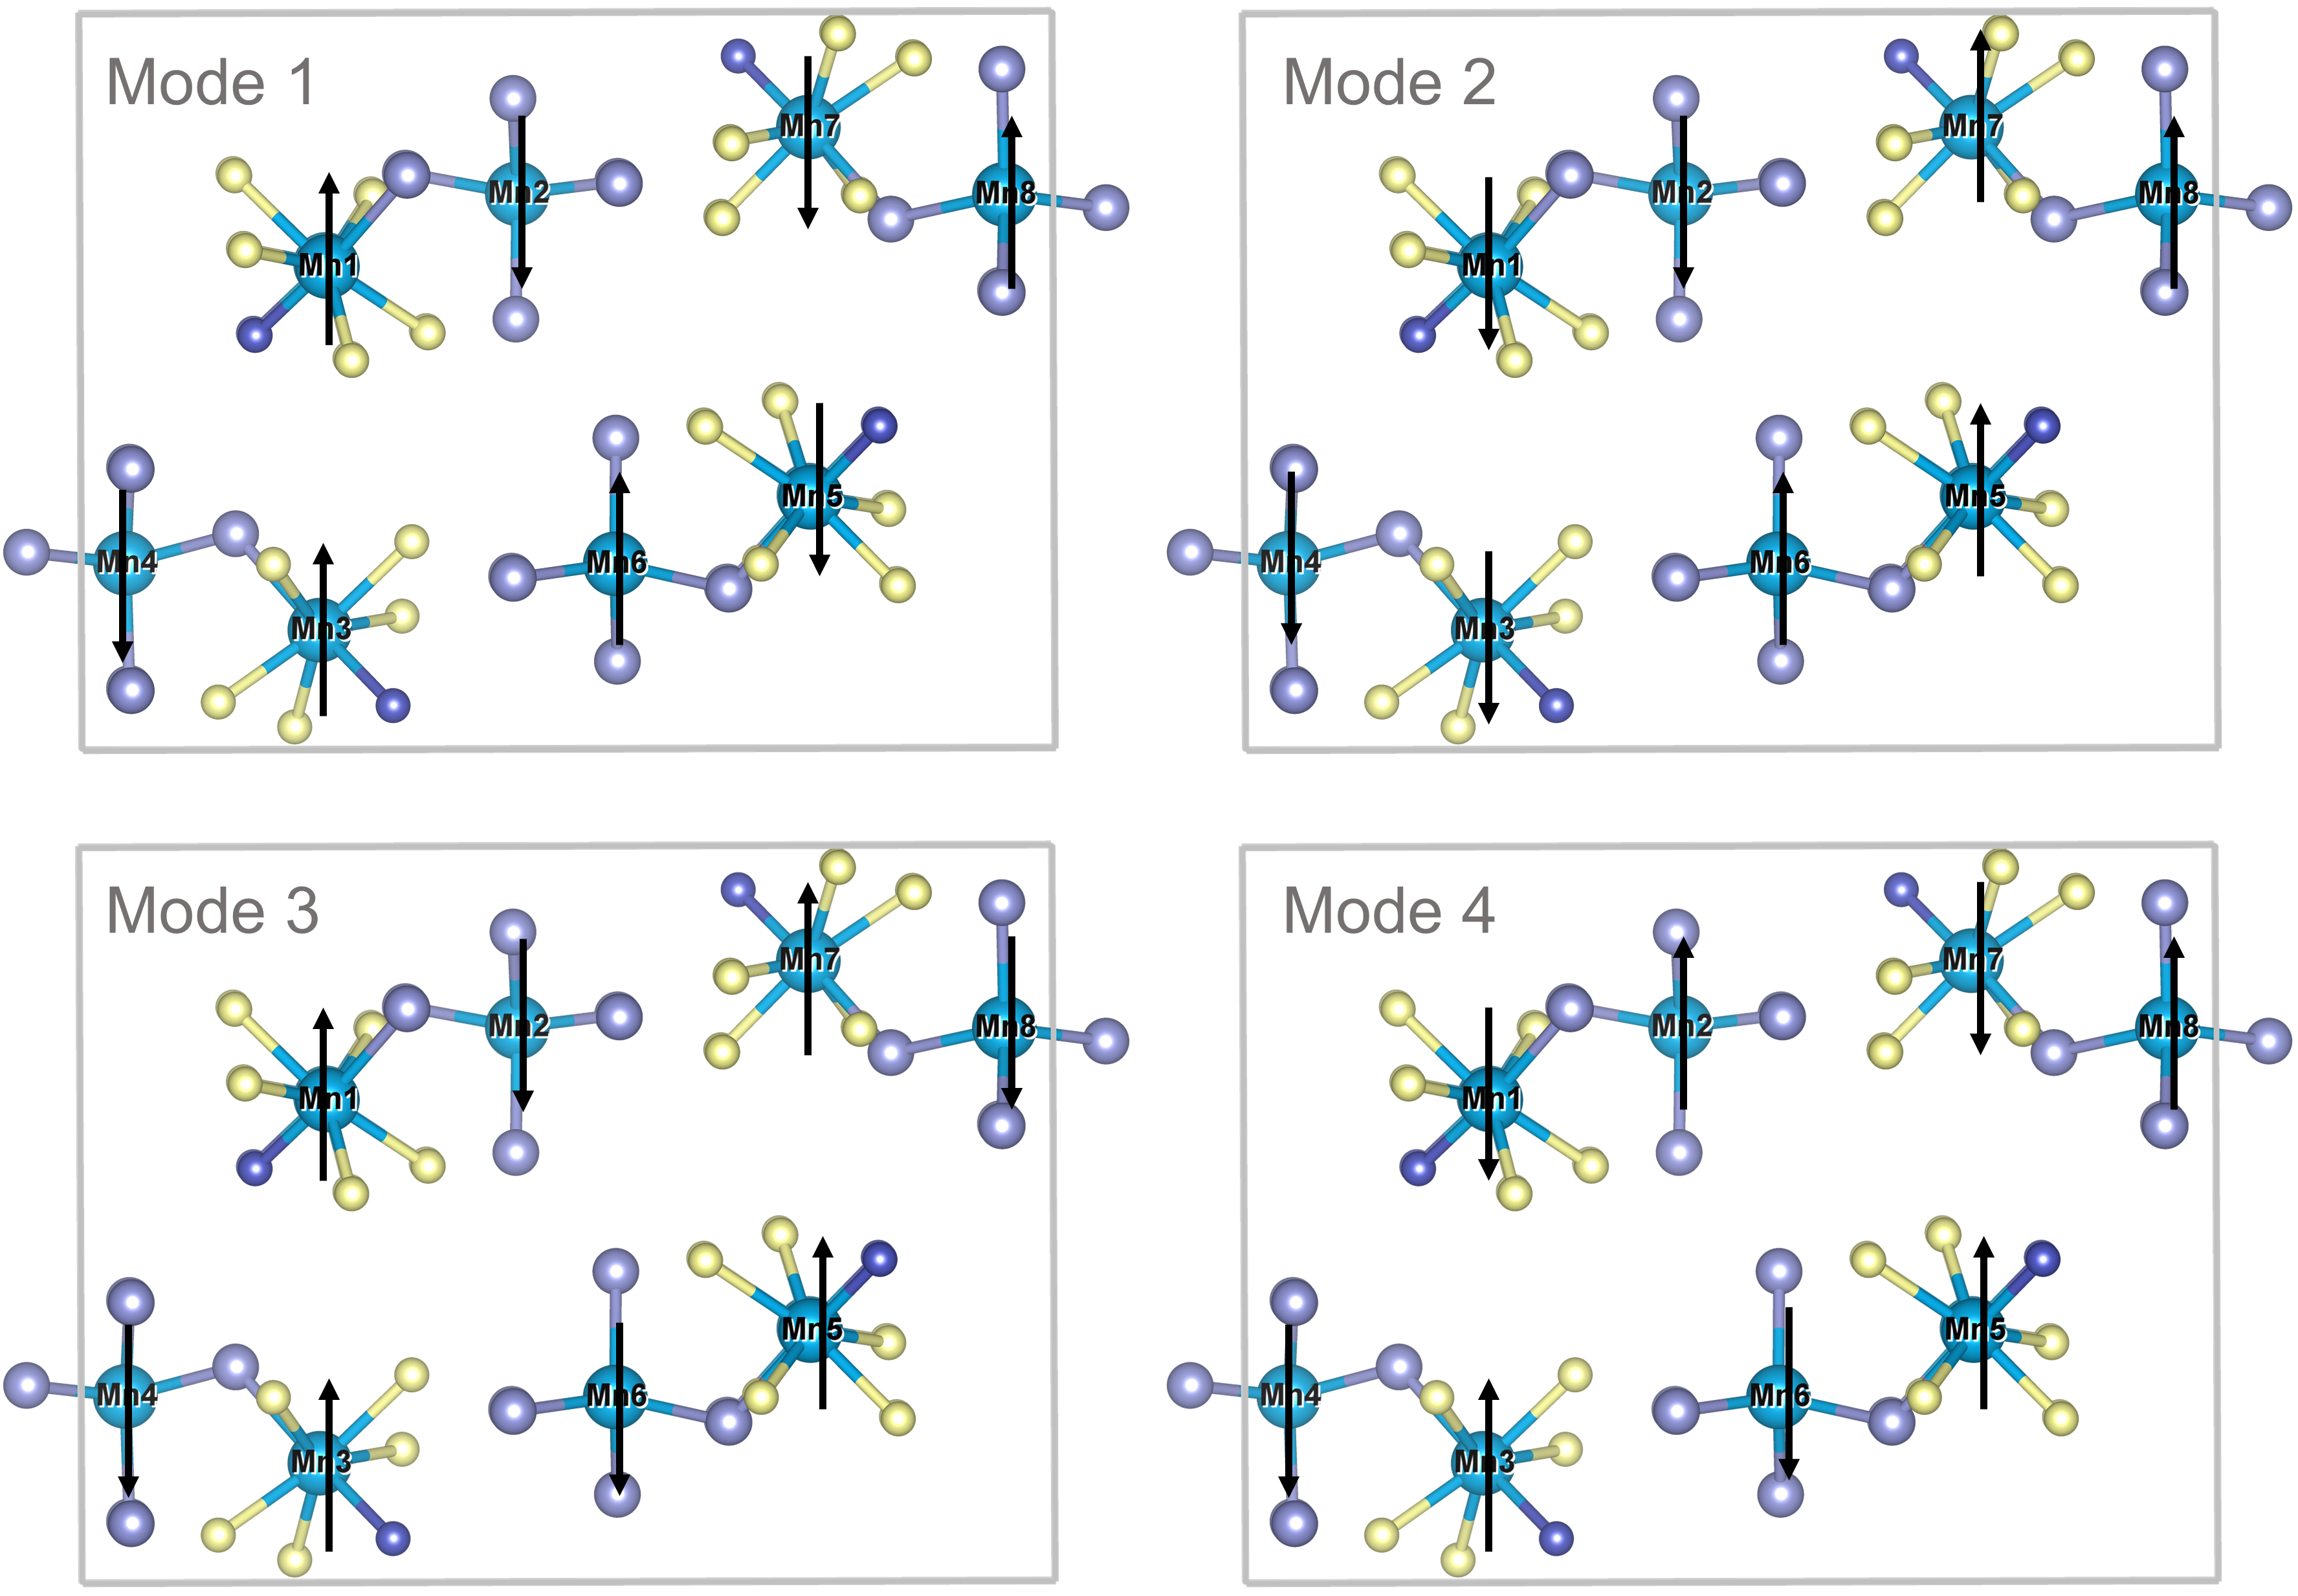


**Fig. S5** Magnetic structures including three different AFM magnetic models (Mode1, 3, 4) and one FM magnetic model (Mode 2).


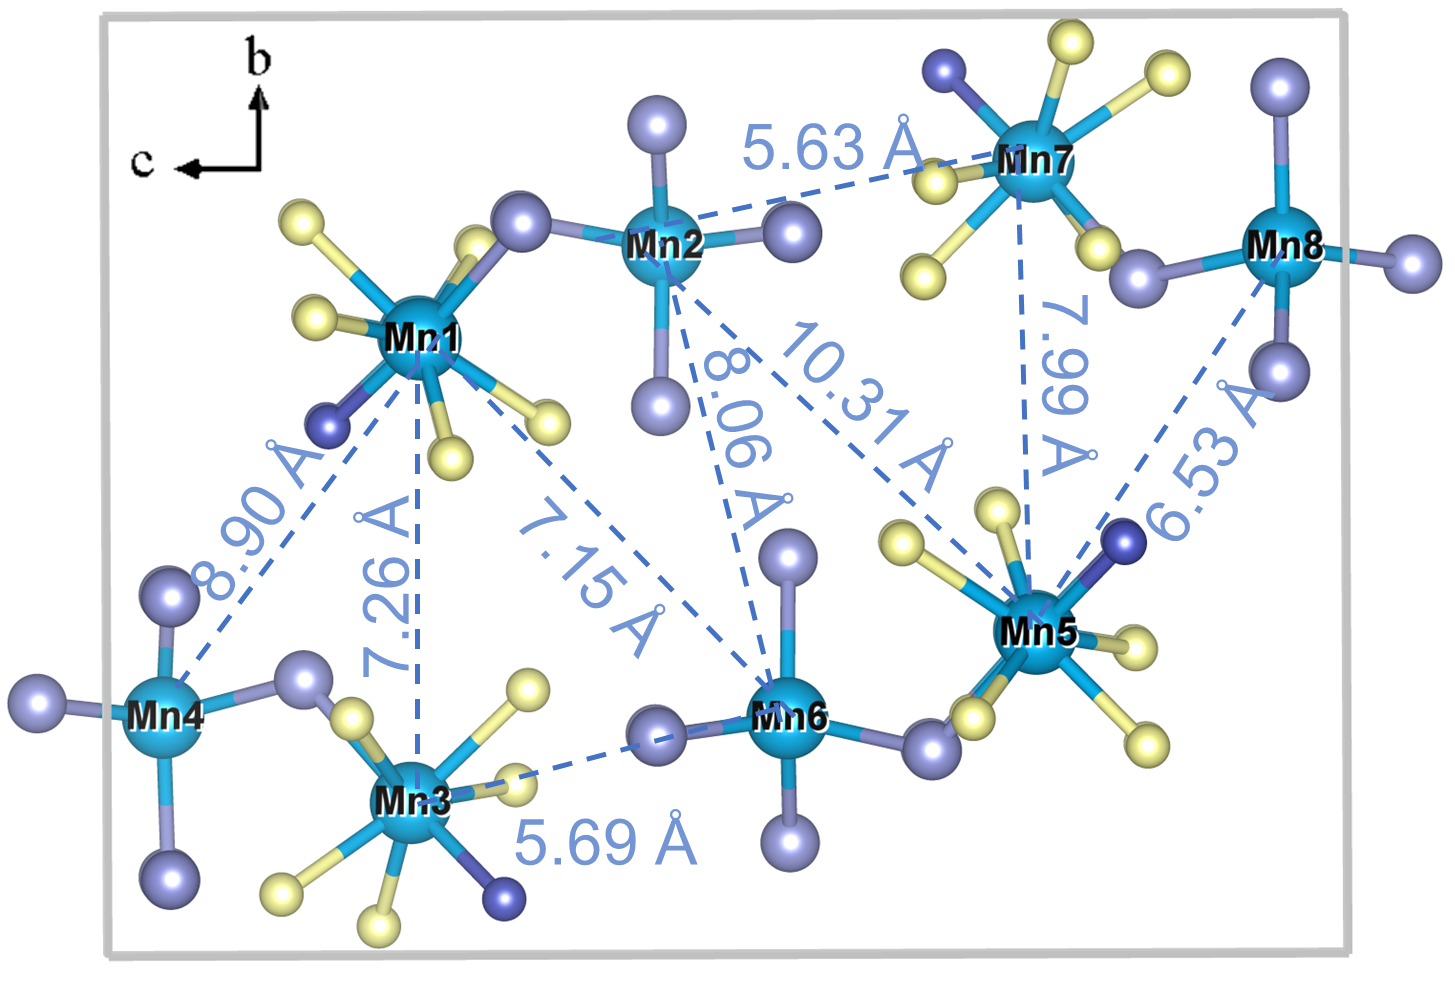


**Fig. S6.** The Mn···Mn distances between different dimers.


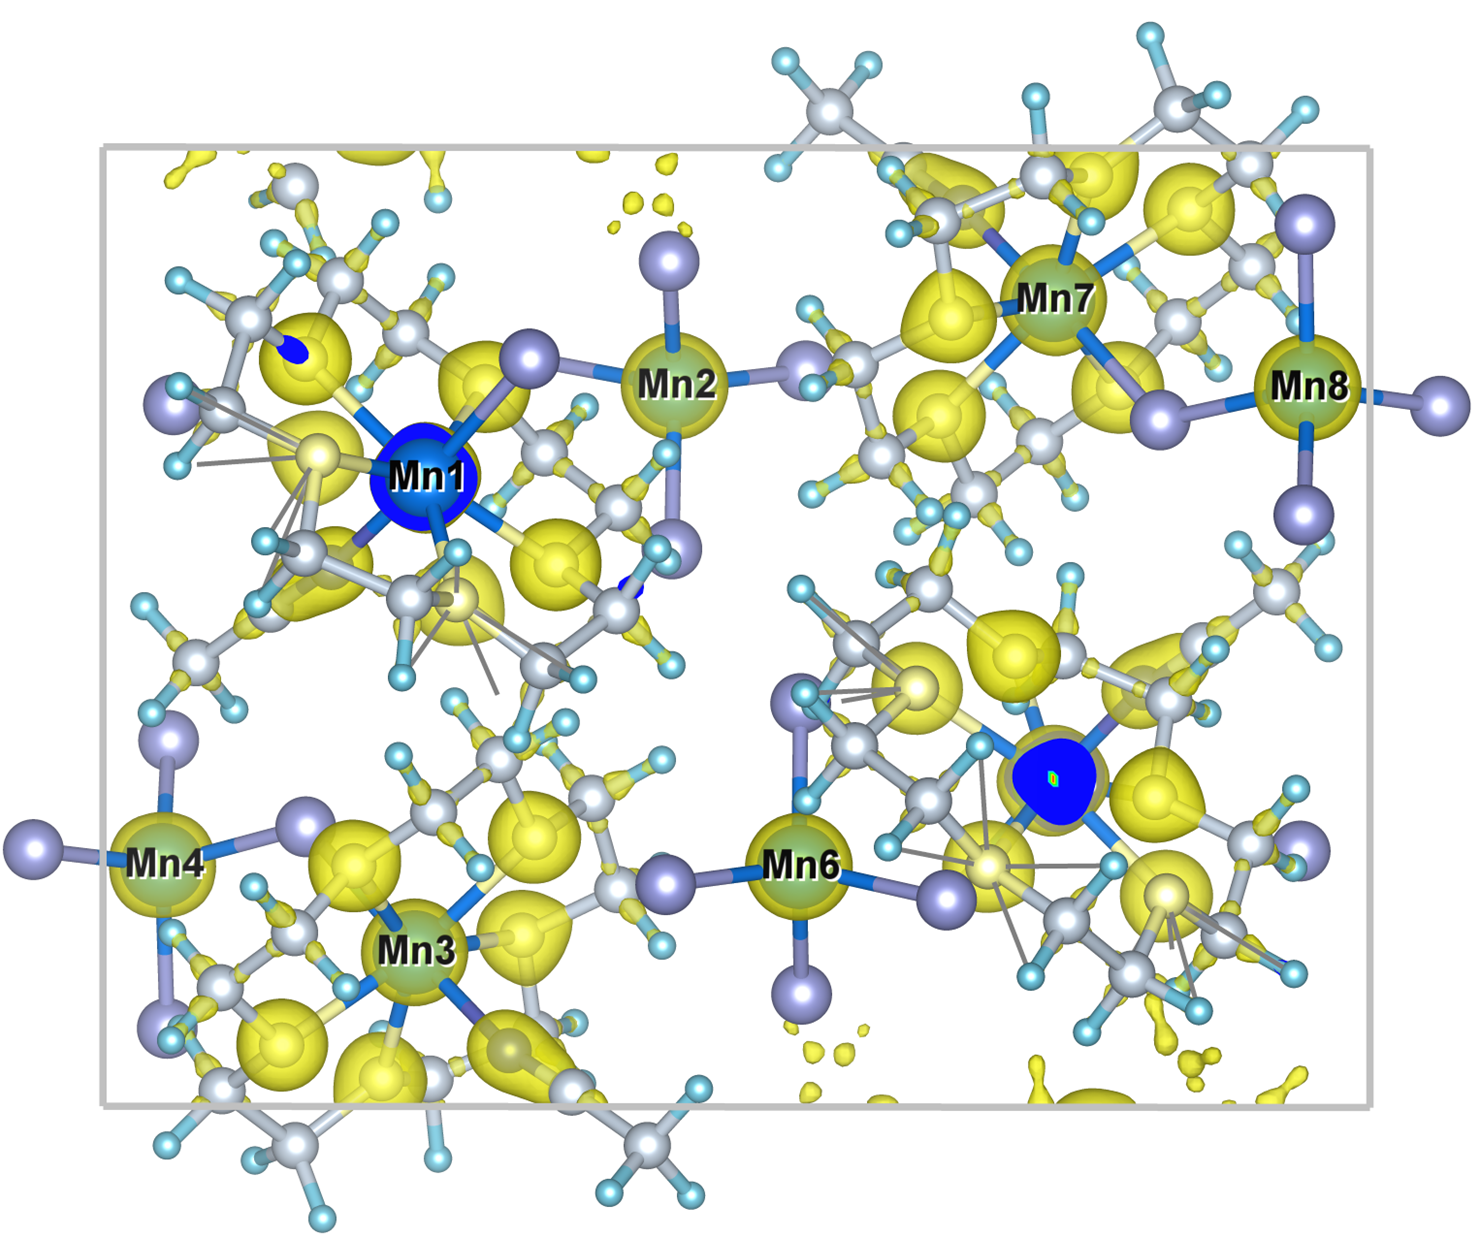


**Fig. S7** The plot depicting the charge density distribution of (C10H20O5Mn)(CH3CN)MnCl4. The yellow and cyan areas signify the charge accumulation and depletion.


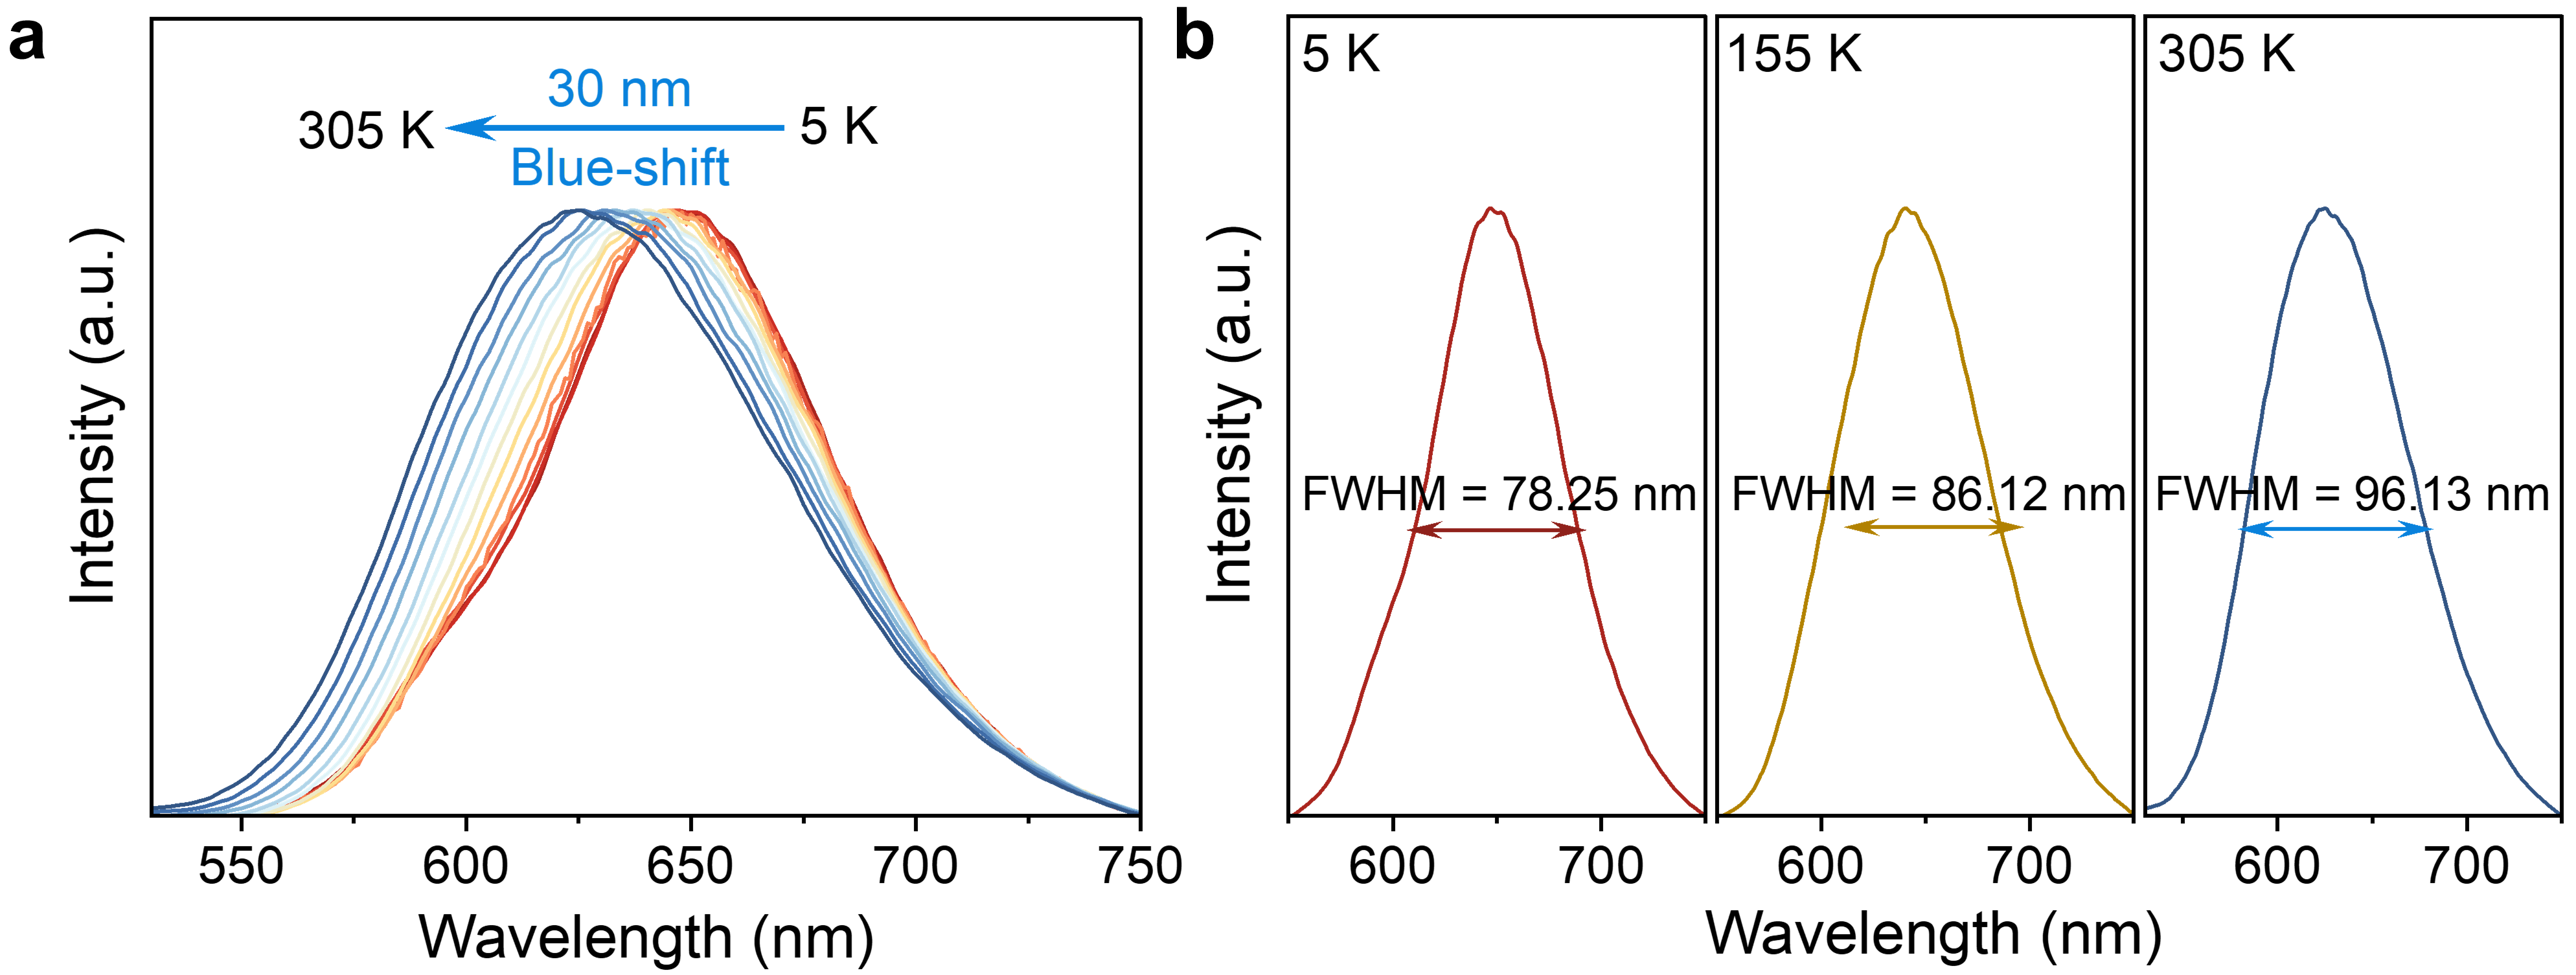


**Fig. S8** Temperature-dependent PL spectra of (C10H20O5Mn)(CH3CN)MnCl4 from 5-305 K. **a)** Temperature-induced blue-shift from 668 nm to 638 nm in spin-canted Mn2+ dimer. **b)** Emission spectra from 5 K to 305 K with a broadening of the FWHM.


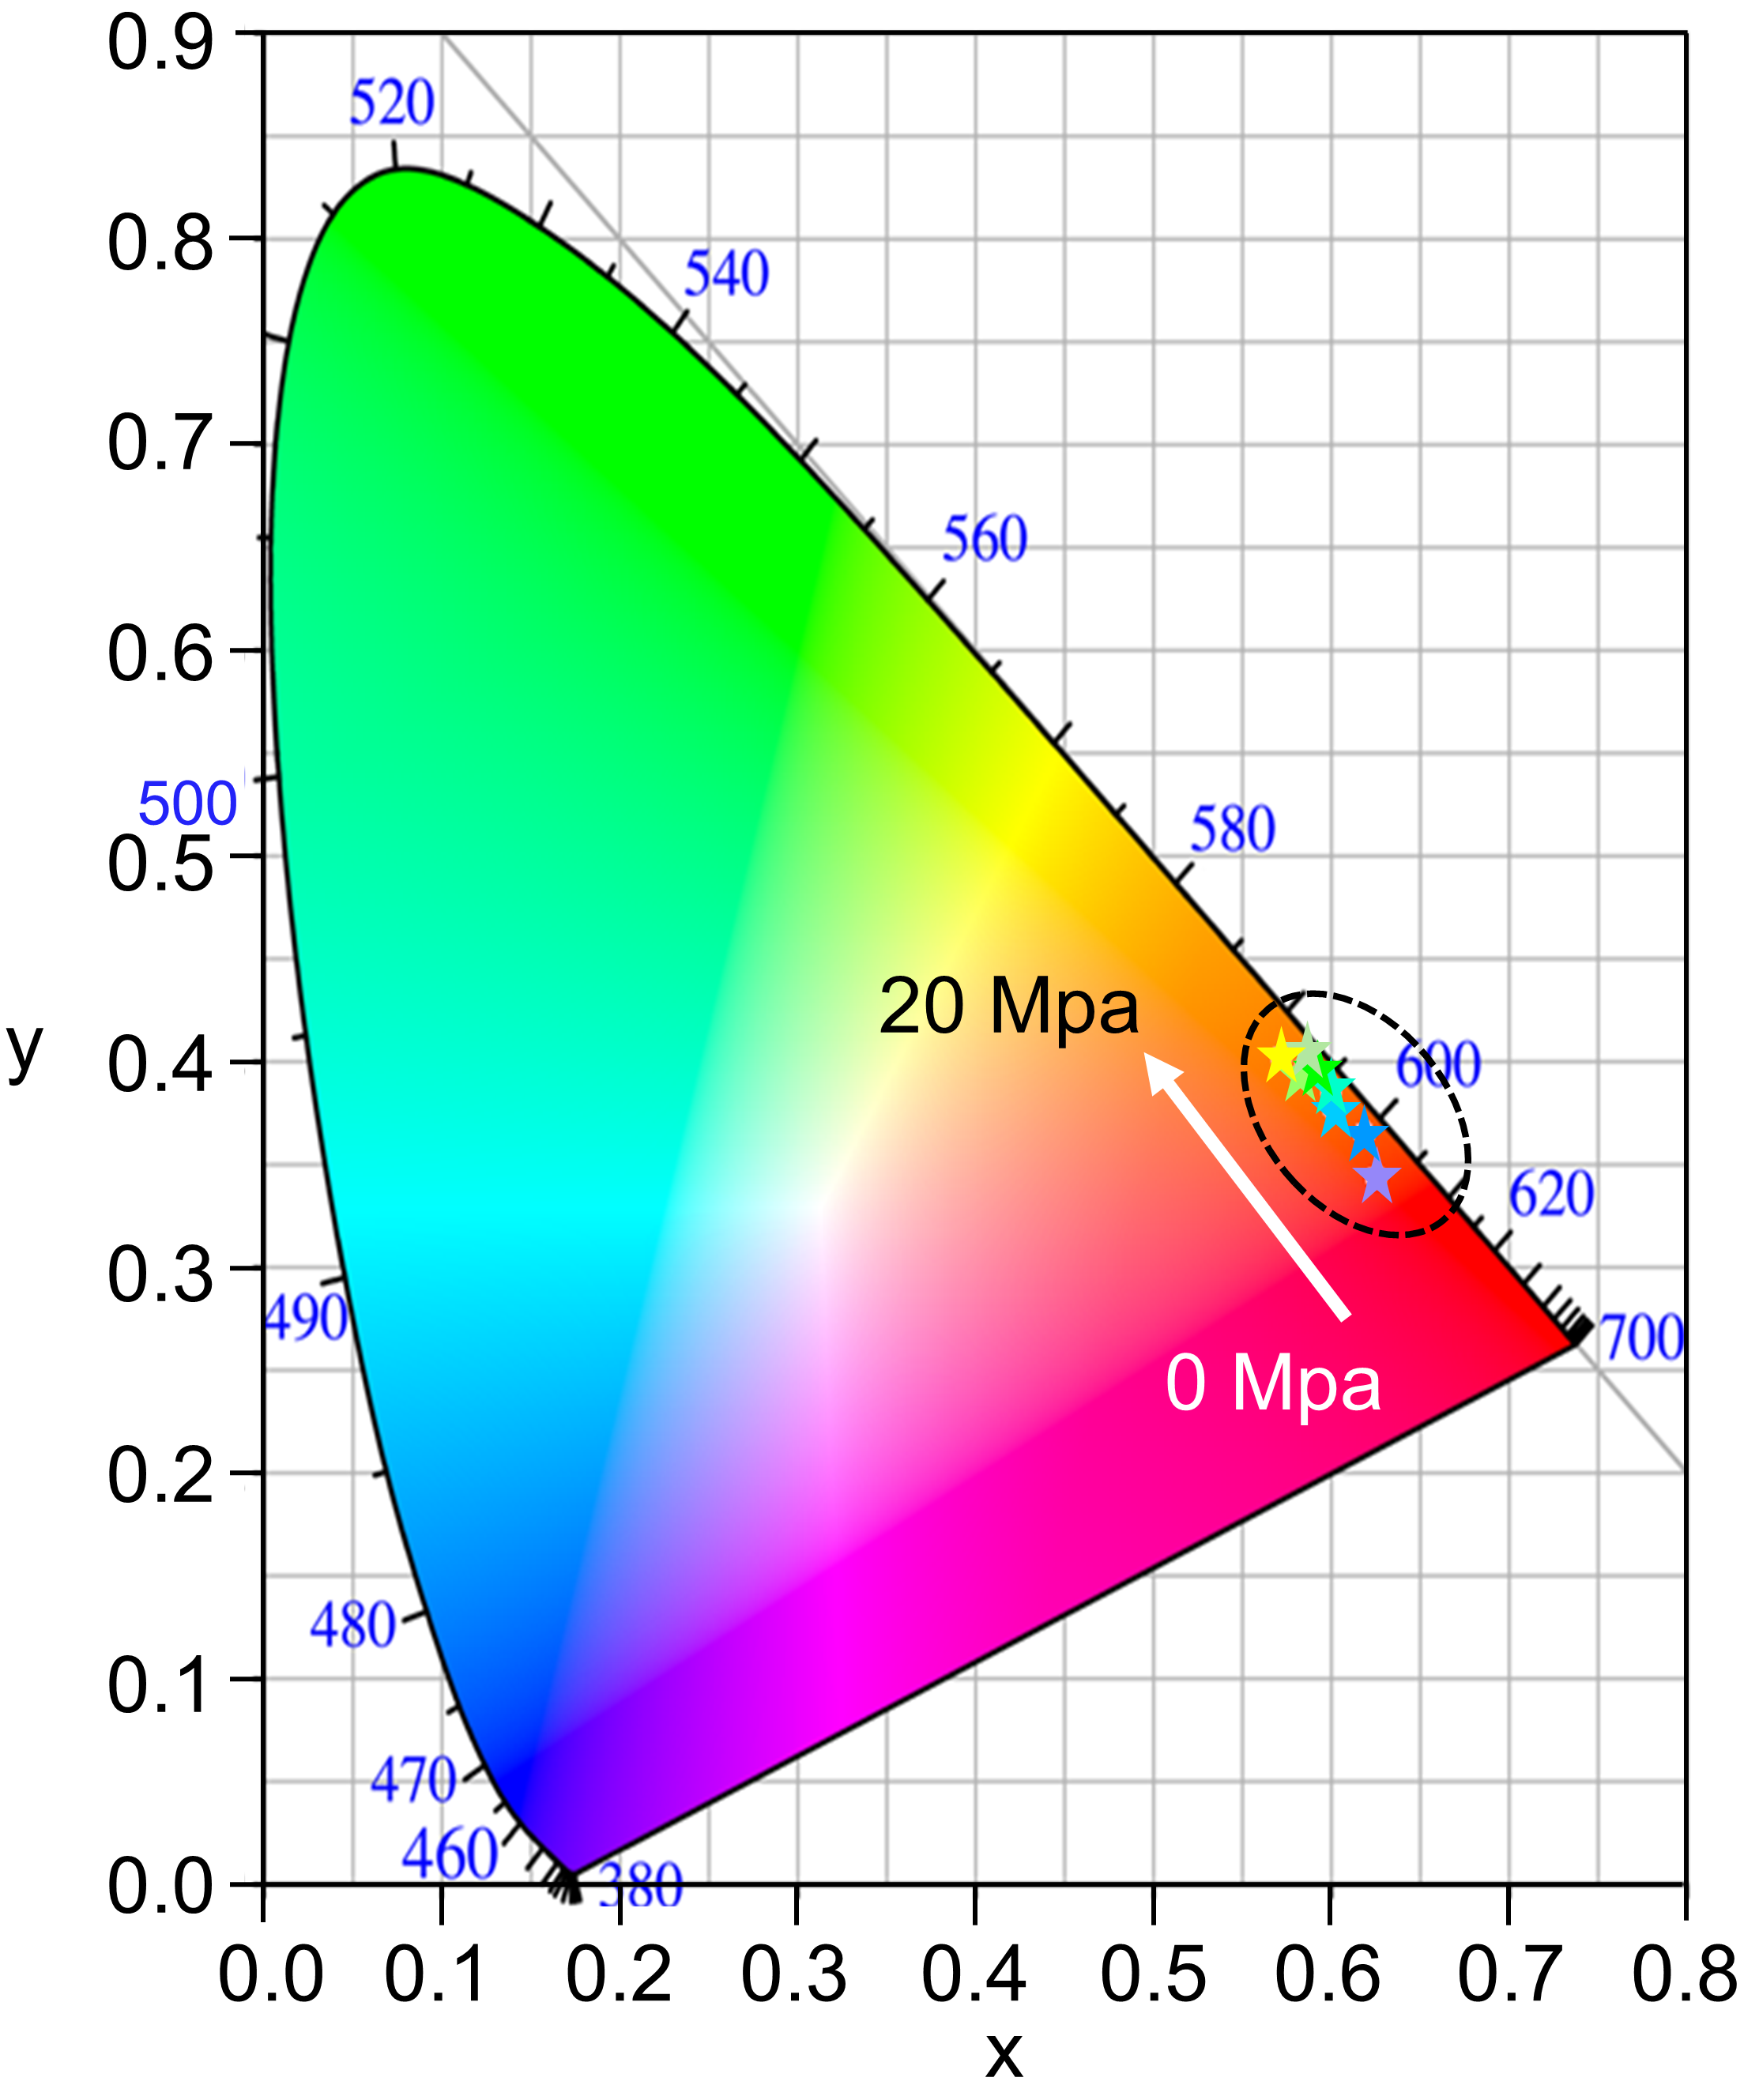


**Fig. S9** The pressures-dependent CIE plots in the range of 0 – 20 MPa.

**Table S1** Main parameters of processing and refinement of the (C10H20O5Mn)(CH3CN)MnCl4 at room temperature (RT).

| **Chemical formula** | **C12H23O5Cl4Mn2N** |
| --- | --- |
| Molecular weight | 512.99 |
| Temperature (K) | 293(2) |
| Space Group, *Z* | *P*21/*n*, 4 |
| *a* (Å) | 9.2163(18) |
| *b* (Å) | 13.278(3) |
| *c* (Å) | 17.365(4) |
| *α*(°) | 90 |
| *β* (°) | 95.41(3) |
| *γ* (°) | 90 |
| *V* (Å3) | 2115.6(7) |
| ρcalc(g/cm3) | 1.611 |
| μ (mm-1) | 1.718 |
| Reflections measured | 31580 |
| Reflections independent | 4337 |
| Reflections with *F* > 4σ(*F*) | 3585 |
| 2θmax (°) | 52.896 |
| *h*, *k*, *l* - limits | -11 ≤ *h* ≤ 11; -16 ≤ *k* ≤ 16; -21 ≤ *l* ≤ 21 |
| *R*int | 0.0585 |
| *Refinement results* |  |
| The weighed refinement of *F*2 | *w* = 1/[*σ*2(*F*o2)+(0.0532*P*)2+0.0369*P*]  where *P* = max(*F*o2+2*F*c2)/3 |
| Number of refinement parameters | 218 |
| *R*1[*F*o > 4σ(*F*o)] | 0.0324 |
| *wR2* | 0.0811 |
| *Goof* | 1.130 |
| ∆*ρ*max(e/Å3) | 0.729 |
| ∆*ρ*min(e/Å3) | -0.765 |
| (∆/*σ*)max | <0.001 |
| Extinction coefficient (SHELXL 2014/7) | 0.0150(8) |

**Table S2** Fractional atomic coordinates and isotropic or equivalent isotropic displacement parameters (Å2)

| **Atom** | ***x*** | ***y*** | ***z*** | ***U*iso**/U*eq** | ***Occ.*** |
| --- | --- | --- | --- | --- | --- |
| Mn1 | 0.46654(3) | 0.66066(2) | 0.74523(2) | 0.03225(12) | 1 |
| Mn2 | 0.72944(4) | 0.75117(2) | 0.55115(2) | 0.03502(12) | 1 |
| Cl1 | 0.59700(7) | 0.78352(5) | 0.66373(3) | 0.04804(18) | 1 |
| Cl2 | 0.83632(7) | 0.59013(5) | 0.55041(4) | 0.04768(17) | 1 |
| Cl3 | 0.91484(7) | 0.87180(5) | 0.55608(4) | 0.05249(18) | 1 |
| Cl4 | 0.54649(8) | 0.76611(6) | 0.44780(4) | 0.0600(2) | 1 |
| O1 | 0.35917(17) | 0.56807(12) | 0.64603(8) | 0.0405(4) | 1 |
| O2 | 0.26032(18) | 0.73918(12) | 0.70301(9) | 0.0432(4) | 1 |
| O3 | 0.42099(18) | 0.77479(12) | 0.83388(9) | 0.0461(4) | 1 |
| O4 | 0.66303(19) | 0.66979(15) | 0.83129(9) | 0.0528(5) | 1 |
| O5 | 0.61244(19) | 0.53916(14) | 0.72042(10) | 0.0559(5) | 1 |
| C1 | 0.2489(3) | 0.6235(2) | 0.59997(14) | 0.0553(7) | 1 |
| C2 | 0.1604(3) | 0.6768(2) | 0.65459(16) | 0.0556(7) | 1 |
| C3 | 0.1945(3) | 0.7950(2) | 0.76103(15) | 0.0540(7) | 1 |
| C4 | 0.3156(3) | 0.8487(2) | 0.80817(16) | 0.0596(8) | 1 |
| C5 | 0.5464(3) | 0.8098(3) | 0.88059(16) | 0.0651(8) | 1 |
| C6 | 0.6395(3) | 0.7209(3) | 0.90093(15) | 0.0686(9) | 1 |
| C7 | 0.7454(3) | 0.5803(3) | 0.83854(18) | 0.0743(9) | 1 |
| C8 | 0.7499(3) | 0.5329(2) | 0.76267(18) | 0.0704(8) | 1 |
| C9 | 0.5757(3) | 0.47153(18) | 0.65751(15) | 0.0515(6) | 1 |
| C10 | 0.4650(3) | 0.52177(19) | 0.60211(14) | 0.0484(6) | 1 |
| C11 | 0.2810(3) | 0.51932(18) | 0.86542(13) | 0.0425(5) | 1 |
| C12 | 0.2040(3) | 0.4657(2) | 0.92163(14) | 0.0583(7) | 1 |
| N1 | 0.3402(2) | 0.56047(16) | 0.82105(11) | 0.0500(5) | 1 |
| H2A | 0.187985 | 0.578032 | 0.567283 | 0.066* | 1 |
| H2B | 0.293269 | 0.671480 | 0.567236 | 0.066* | 1 |
| H3A | 0.086419 | 0.718038 | 0.626408 | 0.067* | 1 |
| H3B | 0.112637 | 0.628752 | 0.685854 | 0.067* | 1 |
| H5A | 0.144064 | 0.750022 | 0.793505 | 0.065* | 1 |
| H5B | 0.124840 | 0.843107 | 0.737210 | 0.065* | 1 |
| H6A | 0.358856 | 0.899136 | 0.776979 | 0.072* | 1 |
| H6B | 0.278676 | 0.881965 | 0.852075 | 0.072* | 1 |
| H8A | 0.517799 | 0.841757 | 0.927067 | 0.078* | 1 |
| H8B | 0.599020 | 0.858576 | 0.852286 | 0.078* | 1 |
| H9A | 0.731844 | 0.742130 | 0.927358 | 0.082* | 1 |
| H9B | 0.591730 | 0.676518 | 0.935027 | 0.082* | 1 |
| H11A | 0.702123 | 0.534355 | 0.873249 | 0.089* | 1 |
| H11B | 0.843781 | 0.595472 | 0.860369 | 0.089* | 1 |
| H12A | 0.822048 | 0.566296 | 0.734448 | 0.084* | 1 |
| H12B | 0.777943 | 0.462750 | 0.769294 | 0.084* | 1 |
| H14A | 0.536395 | 0.409485 | 0.676442 | 0.062* | 1 |
| H14B | 0.661957 | 0.455392 | 0.631946 | 0.062* | 1 |
| H15A | 0.511391 | 0.572222 | 0.572301 | 0.058* | 1 |
| H15B | 0.418414 | 0.472620 | 0.566598 | 0.058* | 1 |
| H18A | 0.268599 | 0.418139 | 0.948745 | 0.070* | 1 |
| H18B | 0.122476 | 0.430566 | 0.895617 | 0.070* | 1 |
| H18C | 0.169803 | 0.512703 | 0.957819 | 0.070* | 1 |

**Table S3** The main bond lengths (Å) of compound (C10H20O5Mn)(CH3CN)MnCl4.

| **Atom‒Atom** | **Length/Å** | **Atom‒Atom** | **Length/Å** |
| --- | --- | --- | --- |
| Mn1‒O1 | 2.2664(16) | C3‒C4 | 1.501(4) |
| Mn1‒O2 | 2.2301(17) | C3‒O2 | 1.432(3) |
| Mn1‒O3 | 2.2283(15) | C4‒O3 | 1.423(3) |
| Mn1‒O4 | 2.2399(18) | C5‒C6 | 1.482(5) |
| Mn1‒O5 | 2.1690(17) | C5‒O3 | 1.426(3) |
| Mn1‒N1 | 2.2690(2) | C6‒O4 | 1.421(3) |
| Mn1‒Cl1 | 2.5359(8) | C7‒C8 | 1.465(4) |
| Mn2‒Cl1 | 2.4386(9) | C7‒O4 | 1.409(4) |
| Mn2‒Cl2 | 2.3548(8) | C8‒O5 | 1.405(3) |
| Mn2‒Cl3 | 2.3378(8) | C9‒C10 | 1.492(4) |
| Mn2‒Cl4 | 2.3519(10) | C9‒O5 | 1.430(3) |
| C1‒C2 | 1.487(4) | C10‒O1 | 1.432(3) |
| C1‒O1 | 1.435(3) | C11‒N1 | 1.126(3) |
| C2‒O2 | 1.448(3) | C11‒C12 | 1.447(3) |

**Table S4** Bond Angles for (C10H20O5Mn)(CH3CN)MnCl4.

| **Atom‒Atom‒Atom** | **Angle/°** | **Atom‒Atom‒Atom** | **Angle/°** |
| --- | --- | --- | --- |
| O1‒Mn1‒Cl1 | 96.94(4) | C1‒O1‒Mn1 | 112.42(14) |
| O1‒Mn1‒N1 | 84.93(7) | C10‒O1‒Mn1 | 111.53(13) |
| O2‒Mn1‒Cl1 | 87.14(5) | C10‒O1‒C1 | 113.90(18) |
| O2‒Mn1‒O1 | 72.91(6) | O1‒C1‒C2 | 106.88(19) |
| O2‒Mn1‒O4 | 143.54(7) | O2‒C2‒C1 | 106.6(2) |
| O2‒Mn1‒N1 | 89.81(7) | C2‒O2‒Mn1 | 113.52(14) |
| O3‒Mn1‒Cl1 | 94.48(5) | C3‒O2‒Mn1 | 114.55(14) |
| O3‒Mn1‒O1 | 142.83(6) | C3‒O2‒C2 | 114.6(2) |
| O3‒Mn1‒O2 | 72.48(6) | O2‒C3‒C4 | 106.7(2) |
| O3‒Mn1‒O4 | 72.26(7) | O3‒C4‒C3 | 107.1(2) |
| O3‒Mn1‒N1 | 81.81(7) | C4‒O3‒Mn1 | 114.84(14) |
| O4‒Mn1‒Cl1 | 86.64(5) | C4‒O3‒C5 | 116.5(2) |
| O4‒Mn1‒O1 | 143.53(6) | C5‒O3‒Mn1 | 114.79(15) |
| O4‒Mn1‒N1 | 94.11(7) | O3‒C5‒C6 | 107.2(2) |
| O5‒Mn1‒Cl1 | 91.85(6) | O4‒C6‒C5 | 108.0(2) |
| O5‒Mn1‒O1 | 71.34(6) | C6‒O4‒Mn1 | 114.53(15) |
| O5‒Mn1‒O2 | 143.84(6) | C7‒O4‒Mn1 | 114.15(16) |
| O5‒Mn1‒O3 | 143.49(7) | C7‒O4‒C6 | 116.8(2) |
| O5‒Mn1‒O4 | 72.28(7) | O4‒C7‒C8 | 110.1(2) |
| O5‒Mn1‒N1 | 92.34(8) | O5‒C8‒C7 | 110.1(2) |
| N1‒Mn1‒Cl1 | 175.78(6) | C8‒O5‒Mn1 | 119.07(16) |
| Cl2‒Mn2‒Cl1 | 113.93(3) | C8‒O5‒C9 | 119.9(2) |
| Cl3‒Mn2‒Cl1 | 105.62(3) | C9‒O5‒Mn1 | 120.83(15) |
| Cl3‒Mn2‒Cl2 | 108.52(3) | O5‒C9‒C10 | 108.03(19) |
| Cl3‒Mn2‒Cl4 | 116.04(3) | O1‒C10‒C9 | 107.90(19) |
| Cl4‒Mn2‒Cl1 | 102.70(3) | C11‒N1‒Mn1 | 171.6(2) |
| Cl4‒Mn2‒Cl2 | 110.03(3) | N1‒C11‒C12 | 179.3(3) |
| Mn2‒Cl1‒Mn1 | 129.32(3) |  |  |

**Table S5** Hydrogen-bond geometry in the (C10H20O5Mn)(CH3CN)MnCl4 structure (Å, °).

| ***D*‒H···*A*** | ***D*‒H** | **H···*A*** | ***D*···*A*** | ***D*‒H···*A*** |
| --- | --- | --- | --- | --- |
| C2‒H2*A*···Cl3i | 0.97 | 2.79 | 3.745 (3) | 167.2 |
| C3‒H3*A*···Cl4ii | 0.97 | 2.91 | 3.725 (3) | 141.9 |
| C5‒H5*A*···Cl2ii | 0.97 | 2.98 | 3.910 (3) | 161.0 |
| C6‒H6*A*···Cl4iii | 0.97 | 2.89 | 3.766 (3) | 150.8 |
| C6‒H6*B*···Cl3ii | 0.97 | 2.85 | 3.757 (3) | 155.6 |
| C7‒H7*A*···Cl3iv | 0.97 | 2.75 | 3.703 (4) | 166.4 |
| C7‒H7*B*···Cl4iii | 0.97 | 2.94 | 3.802 (3) | 148.9 |
| C8‒H8*B*···Cl1iv | 0.97 | 2.84 | 3.774 (3) | 160.8 |
| C9‒H9*B*···Cl2 | 0.97 | 2.87 | 3.543 (3) | 127.5 |
| C12‒H12*B*···Cl1v | 0.96 | 2.93 | 3.869 (3) | 166.8 |

Symmetry codes: (i) *x*-1, *y*, *z*; (ii) *x*-1/2, -*y*+3/2, *z*+1/2; (iii) *x*+1/2, -*y*+3/2, *z*+1/2; (iv) -*x*+3/2, *y*-1/2, -*z*+3/2; (v) -*x*+1/2, *y*-1/2, -*z*+3/2.

**Table S6** Total energy for various hypothetic models.

| **Mode** | **Total Energy (eV)** |
| --- | --- |
| 1 | -1066.01607 |
| 2 | -1065.96361 |
| 3 | -1066.01616 |
| 4 | -1066.01605 |

**Table S7**Comparison of fluorescent lifetime parameters of 0D hybrid Mn(II) chloride.

|  | **Single crystal** | **Fluorescence lifetime** | **References** |
| --- | --- | --- | --- |
| 1 | TAMn2Cl5⋅2H2O | 1.14 ms | 1 |
| 2 | (*S*‑C3H10ON)MnCl3 | 1.02 ms | 2 |
| 3 | (C4NOH10)5Mn2Cl9·C2H5OH | 4.83 ms | 3 |
|  | (ABI)4MnCl6 | 13.19 ms | 4 |
| 4 | Mn-2DMAP | 1.21 ms | 5 |
| 5 | Mn-4DMAP | 1.79 ms | 5 |
| 6 | (C4NOH10)2MnCl4 | 3.36 ms | 3 |
| 7 | (C13H26N)2MnCl4 | 3.829 ms | 6 |
| 8 | (C7H18N)2MnCl4 | 4.206 ms | 6 |
| 9 | (C8H20N)2MnCl4 | 3.42 ms | 7 |
| 10 | (Ph4P)2MnCl4 | 3.9 ms | 8 |
| 11 | (C9H12N2)2MnCl4 | 2.094 ms | 9 |
| 12 | (C5H13N3)2MnCl4 | 3.54 ms | 10 |
| 13 | (C24H20P)2MnCl4 | 2.46 ms | 11 |
| 14 | [DMAEMP]MnCl4 | 3.26 ms | 12 |
| 15 | [MMPrIm]MnCl4 | 3.527 ms | 12 |
| 16 | [EP]MnCl4 | 1.40 ms | 12 |
| 17 | (KC)2MnCl4 | 2.79 ms | 13 |

**Table S8** Relationship between line width (ΔH) and pressure variation.

| **Pressure (MPa)** | **ΔH (G)** |
| --- | --- |
| 0 | 406.17 |
| 2 | 411.76 |
| 3 | 442.09 |
| 4 | 450.07 |
| 5 | 456.46 |
| 10 | 459.64 |
| 15 | 460.45 |
| 20 | 458.84 |

**References**

1. Cong*, et al.* Manganese halides with timely and delayed reversible thermal fluorescence quenching for dual-secure information encryption and anti-counterfeiting. *Chem. Eng. J.* **505**, 159672 (2025).

2. Panda, Swain, Raghunathan, Sundaresan. Negative thermal quenching and self-trapped exciton emission in (R/S-C3H10ON)MnCl3. *Chem. Mater.* **36**, 5698-5708 (2024).

3. Sun, Li, Dong, Zang. Thermoinduced structural-transformation and thermochromic luminescence in organic manganese chloride crystals. *Chem. Sci.* **10**, 3836-3839 (2019).

4. Wang*, et al.* Flexible 3D printed fibers of novel manganese halides with superior acid/alkali resistance for X-ray imaging and radiation warning. *Chem. Eng. J.* **515**, 163495 (2025).

5. Zhou, Li, Dai, Han, Yan. Dynamic magneto-optical response and reversible humidity-sensitive luminescence tuned by intermolecular interactions in manganese halides. *Adv. Funct. Mater.* **n/a**, 2503326 (2025).

6. Wang*, et al.* Efficient narrow-band green light-emitting hybrid halides for wide color gamut display. *ACS Appl. Electron. Mater.* **4**, 4068-4076 (2022).

7. Chang*, et al.* Temperature-dependent reversible optical properties of Mn-based organic–inorganic hybrid (C8H20N)2MnCl4 metal halides. *ACS Appl. Mater. Interfaces* **15**, 5487-5494 (2023).

8. Ben‐Akacha*, et al.* Mechanochemical synthesis of zero dimensional organic‐inorganic metal halide hybrids. *ChemPhotoChem* **4**, 1–5 (2020).

9. Cong*, et al.* Reversible thermodynamic phase-transition in zero-dimensional manganese halides enables dual-secure optical information anti-counterfeiting and encryption. *Laser Photonics Rev.*, e00761 (2025).

10. Cheng*, et al.* Centimeter‐sized single crystals of tetrahedral manganese (Ⅱ) halide hybrids for wide‐color gamut backlighting displays. *Small*, 2307216 (2023).

11. Zhou, Liu, Molokeev, Xiao, Xia, Zhang. Manipulation of Cl/Br transmutation in zero-dimensional Mn2+-based metal halides toward tunable photoluminescence and thermal quenching behaviors. *J. Mater. Chem. C* **9**, 2047-2053 (2021).

12. Pan*, et al.* Enhancement of the photoluminescence efficiency of hybrid manganese halides through rational structural design. *Chem. Commun.* **57**, 6907-6910 (2021).

13. Zhao*, et al.* Circularly polarized luminescence from achiral single crystals of hybrid manganese halides. *J. Am. Chem. Soc.* **141**, 15755-15760 (2019).
